# Supplementary material
Source: publisher figshare collection journal article supplement (https://gsapubs.figshare.com/ndownloader/files/22409802)
Supplement: Supplementary file 1 [file 22409802]

## Sheet: Sheet1
Linde, G.M., Trexler, J.H., Jr., Cashman, P.H., Gehrels, G., and Dickinson, W.R., 2016, Detrital zircon U-Pb geochronology and Hf isotope geochemistry of the Roberts Mountains allochthon: New insights into the early Paleozoic tectonics of western North America: Geosphere, v. 12, doi:10.1130/GES01252.1.
Supplemental Table 2: Hf Isotopic data of selected Roberts Mountains allochton strata
	(176Yb + 176Lu) / 176Hf (%)	Volts Hf	176Hf/177Hf	± (1s)	176Lu/177Hf	176Hf/177Hf (T)	E-Hf (0)	E-Hf (0) ± (1s)	E-Hf (T)	Age (Ma)
Sample: Snow Canyon Formation. Location: Snow Canyon, Independence Mountains; 0579760 4585698 (NAD 83 UTM 11T)
Snow-CYN-GG2000SPE-9	6.85411	5.38378	0.281448	1.58292e-05	0.0004084	0.281434	-47.2752	0.55976	-6.58936	1826.38
Snow-CYAN-GG2000SPE-30	7.50977	5.30111	0.281335	1.66281e-05	0.000439741	0.28132	-51.2717	0.588011	-10.627	1827
Snow-CYAN-GG2000SPE-38	9.17332	4.80847	0.28142	2.10548e-05	0.00054866	0.281401	-48.2749	0.744551	-7.69982	1829.3
Snow-CYAN-GG2000SPE-27	9.14677	4.46808	0.281408	2.00155e-05	0.000553633	0.281389	-48.7009	0.707801	-8.08343	1831.52
Snow-CYN-GG2000SPE-14	7.53183	5.10768	0.281438	2.06812e-05	0.00045909	0.281422	-47.6419	0.731342	-6.89895	1831.71
Snow-CYAN-GG2000SPE-36	14.3626	4.01067	0.281423	2.18853e-05	0.000838854	0.281394	-48.1501	0.773921	-7.87009	1832.08
Snow-CYAN-GG2000SPE-58	6.7635	5.46194	0.281443	1.97082e-05	0.000406799	0.281429	-47.4581	0.696933	-6.41374	1842.08
Snow-CYN-GG2000SPE-45	11.0524	5.50327	0.281453	1.80115e-05	0.000627895	0.281431	-47.1052	0.636932	-6.2991	1843.63
Snow-CYN-GG2000SPE-48	8.97958	4.77918	0.281478	2.23003e-05	0.000508139	0.28146	-46.2309	0.788595	-5.2493	1844.64
Snow-CYN-GG2000SPE-53L	17.4569	4.72369	0.281499	2.21062e-05	0.000976621	0.281465	-45.4821	0.781732	-5.07446	1844.9
Snow-CYN-GG2000SPE-53R	7.73271	5.04583	0.281422	2.143e-05	0.000450743	0.281406	-48.2099	0.757819	-7.15924	1844.9
Snow-CYAN-GG2000SPE-195	10.9455	5.54907	0.281532	1.92945e-05	0.000667577	0.281509	-44.3112	0.682303	-3.42732	1848.74
Snow-CYAN-GG2000SPE-181	15.9435	4.51507	0.281463	1.97067e-05	0.000901565	0.281431	-46.7441	0.696878	-6.14852	1849.35
Snow-CYAN-GG2000SPE-186	6.91052	4.51446	0.28142	1.85721e-05	0.000401436	0.281406	-48.2765	0.656757	-7.03475	1850.61
Snow-CYAN-GG2000SPE-57	6.97443	5.22563	0.281444	1.60483e-05	0.000446838	0.281428	-47.416	0.567509	-6.17522	1852.9
Snow-CYAN-GG2000SPE-190	12.1813	4.19836	0.281542	2.50717e-05	0.000712384	0.281517	-43.9658	0.8866	-2.94255	1857.33
Snow-CYAN-GG2000SPE-129	2.72687	5.06637	0.281464	2.33107e-05	0.000241563	0.281455	-46.7257	0.824327	-5.12322	1857.37
Snow-CYN-GG2000SPE-198	9.61423	5.08731	0.281831	1.49397e-05	0.000597299	0.28181	-33.7226	0.528307	7.77162	1869.84
Snow-CYAN-GG2000SPE-184	6.43459	5.22984	0.281363	2.08214e-05	0.000387019	0.281349	-50.2928	0.736297	-8.2872	1883.72
Snow-CYAN-GG2000SPE-193	7.02521	5.47087	0.281426	2.30638e-05	0.000407155	0.281411	-48.0735	0.815596	-6.02638	1886.25
Snow-CYN-GG2000SPE-44	3.92343	6.87546	0.281616	1.69618e-05	0.000337613	0.281604	-41.3464	0.599813	1.23778	1904.62
Snow-CYN-GG2000SPE-24	7.30969	4.75382	0.281465	2.22904e-05	0.000425074	0.281449	-46.696	0.788246	-4.22001	1905.82
Snow-CYN-GG2000SPE-12	3.4413	5.67961	0.281421	2.21404e-05	0.000264907	0.281411	-48.2457	0.782943	-5.4042	1913.08
Snow-CYN-GG2000SPE-42	9.5039	5.83853	0.281502	1.82027e-05	0.000553631	0.281482	-45.3704	0.643693	-2.80003	1917.01
Snow-CYAN-GG2000SPE-60	11.8816	4.58466	0.281362	2.04061e-05	0.000647658	0.281338	-50.3371	0.721611	-7.74142	1924.46
Snow-CYN-GG2000SPE-199	6.68226	4.66936	0.281457	1.91863e-05	0.000390189	0.281443	-46.9596	0.678476	-3.99275	1925.42
Snow-CYN-GG2000SPE-51	14.898	5.69834	0.281261	2.1617e-05	0.00083681	0.28123	-53.8991	0.764432	-11.5265	1926.16
Snow-CYN-GG2000SPE-16	5.78124	5.42668	0.28141	1.60135e-05	0.000347334	0.281397	-48.6329	0.56628	-5.56872	1927.56
Snow-CYAN-GG2000SPE-137	10.7482	4.01851	0.281491	2.02417e-05	0.000724023	0.281463	-45.7546	0.715797	-1.16193	2016.27
Snow-CYN-GG2000SPE-55	11.3701	4.8428	0.281497	2.03292e-05	0.000665478	0.281471	-45.531	0.718894	0.0512371	2056.32
Snow-CYAN-GG2000SPE-180	8.18189	4.99742	0.281417	2.10754e-05	0.000507201	0.281397	-48.3837	0.745281	-2.55028	2058.27
Snow-CYN-GG2000SPE-174	12.3218	5.20613	0.28145	1.45696e-05	0.000765155	0.28142	-47.2117	0.515217	-1.46108	2070.23
Snow-CYAN-GG2000SPE-168	7.24596	5.0644	0.281438	1.96437e-05	0.00045335	0.28142	-47.63	0.694653	-1.41556	2071.51
Snow-CYN-GG2000SPE-46	8.91086	6.3887	0.281114	1.51246e-05	0.000510595	0.281089	-59.088	0.534846	-2.63738	2524.26
Snow-CYN-GG2000SPE-25	19.9433	4.6051	0.281254	2.24368e-05	0.00120487	0.281191	-54.1566	0.793423	4.98291	2694.73
Snow-CYN-GG2000SPE-13	3.60763	5.78355	0.281007	1.90582e-05	0.000224667	0.280995	-62.8734	0.673946	-1.77575	2703.84
Snow-CYN-GG2000SPE-41	7.5657	5.34737	0.28106	1.51283e-05	0.000449374	0.281036	-61.0123	0.534974	-0.284624	2705.24
Snow-CYN-GG2000SPE-165	4.45796	4.31611	0.281052	2.47982e-05	0.00027404	0.281038	-61.2798	0.876929	0.153417	2721.73
Snow-CYAN-GG2000SPE-34	2.97147	5.33698	0.280916	2.18394e-05	0.00021542	0.280905	-66.0947	0.772296	-4.42786	2728.37
Snow-CYAN-GG2000SPE-192	8.56709	3.53009	0.281127	2.3318e-05	0.000485126	0.281102	-58.6274	0.824584	2.64381	2730.93
Snow-CYN-GG2000SPE-26	11.9718	5.31986	0.281035	1.92373e-05	0.000721672	0.280997	-61.8942	0.680282	-0.900468	2738.9
Snow-CYAN-GG2000SPE-123	5.86872	4.74776	0.281031	2.77909e-05	0.000381732	0.28101	-62.0226	0.982757	2.0287	2843.13
Sample: McAfee Quartzite. Location:McAfee Creek, Independence Mountains; 0590637 4599583 (NAD 83 UTM 11T)
MCAFEE-97SF1-GG2000SPE-196	8.52171	4.71424	0.281278	2.08706e-05	0.000538193	0.28126	-53.2887	0.738037	-13.315	1803.09
MCAFEE-97SF1-GG2000SPE-138	7.6278	4.28669	0.281454	2.04786e-05	0.000448254	0.281439	-47.067	0.724174	-6.69166	1814.84
MCAFEE-97SF1-GG2000SPE-24	5.42954	4.77894	0.281485	1.94588e-05	0.000342143	0.281473	-45.9834	0.688114	-5.11735	1830.47
MCAFEE-97SF1-GG2000SPE-32	18.5327	5.48111	0.281386	1.9365e-05	0.00109757	0.281347	-49.4867	0.684797	-9.52193	1832.53
MCAFEE-97SF1-GG2000SPE-29	5.94833	5.31269	0.281436	1.79178e-05	0.000371133	0.281423	-47.6919	0.633617	-6.79135	1833.87
MCAFEE-97SF1-GG2000SPE-182	10.2626	4.08969	0.281427	2.19853e-05	0.000624047	0.281405	-48.0352	0.777457	-7.42714	1834.83
MCAFEE-97SF1-GG2000SPE-4	12.3779	3.97535	0.281818	2.71953e-05	0.000742151	0.281792	-34.2046	0.961697	6.32	1835.06
MCAFEE-97SF1-GG2000SPE-199	10.5984	4.67592	0.281401	1.71139e-05	0.000623494	0.28138	-48.9255	0.605192	-8.31411	1835.11
MCAFEE-97SF1-GG2000SPE-1	11.1522	4.0314	0.281523	2.13318e-05	0.00067269	0.281499	-44.6451	0.754349	-4.024	1837.45
MCAFEE-97SF1-GG2000SPE-171	7.06736	5.10271	0.281428	1.89101e-05	0.000444308	0.281413	-47.9766	0.668711	-7.08084	1837.69
MCAFEE-97SF1-GG2000SPE-10	6.20614	5.0908	0.281439	2.19883e-05	0.000382735	0.281426	-47.5912	0.777561	-6.61362	1837.86
MCAFEE-97SF1-GG2000SPE-2	11.4118	4.36635	0.281482	2.69185e-05	0.000694711	0.281458	-46.0633	0.951905	-5.32529	1844.1
MCAFEE-97SF1-GG2000SPE-181	5.70356	5.19731	0.281417	1.55154e-05	0.000354953	0.281405	-48.3689	0.548665	-7.21266	1844.33
MCAFEE-97SF1-GG2000SPE-9	8.22763	3.81962	0.281498	2.36141e-05	0.000550182	0.281479	-45.5013	0.835054	-4.54334	1845.77
MCAFEE-97SF1-GG2000SPE-7	7.03972	4.58297	0.281586	2.35014e-05	0.000422765	0.281571	-42.4015	0.831069	-1.26763	1845.96
MCAFEE-97SF1-GG2000SPE-21	9.22941	4.64974	0.281437	2.07233e-05	0.000560371	0.281418	-47.6625	0.732829	-6.70039	1846.91
MCAFEE-97SF1-GG2000SPE-15	15.7219	4.59459	0.281415	2.08419e-05	0.00091534	0.281383	-48.4511	0.737025	-7.93142	1847.05
MCAFEE-97SF1-GG2000SPE-179	11.101	4.19849	0.281251	1.98314e-05	0.000737916	0.281225	-54.2365	0.701291	-13.4864	1848.54
MCAFEE-97SF1-GG2000SPE-174	7.03078	4.42526	0.281468	2.15819e-05	0.000424393	0.281453	-46.5891	0.76319	-5.22941	1856.74
MCAFEE-97SF1-GG2000SPE-186	19.0122	3.40969	0.28145	2.98291e-05	0.001159	0.281409	-47.2207	1.05483	-6.6572	1862.43
MCAFEE-97SF1-GG2000SPE-188	10.4498	5.72535	0.281584	1.91697e-05	0.000629128	0.281562	-42.4759	0.677891	-1.22505	1862.5
MCAFEE-97SF1-GG2000SPE-198	6.78638	3.83158	0.281853	2.09037e-05	0.000402576	0.281839	-32.961	0.739207	8.69069	1865.83
MCAFEE-97SF1-GG2000SPE-84	9.50394	5.94034	0.281276	1.94978e-05	0.000563545	0.281255	-53.3779	0.689493	-11.6121	1883.62
MCAFEE-97SF1-GG2000SPE-16	17.3875	4.52275	0.281507	2.1668e-05	0.0010171	0.28147	-45.206	0.766235	-3.39763	1909.73
MCAFEE-97SF1-GG2000SPE-197	5.15541	5.4782	0.28134	2.00794e-05	0.000308985	0.281328	-51.1137	0.710057	-8.34292	1913.02
MCAFEE-97SF1-GG2000SPE-175	5.90578	3.74591	0.281433	2.6261e-05	0.000372957	0.281419	-47.8148	0.928658	-5.03101	1916.58
MCAFEE-97SF1-GG2000SPE-12	1.96843	4.90646	0.281366	1.77846e-05	0.000120003	0.281362	-50.1654	0.628911	-7.04804	1917.3
MCAFEE-97SF1-GG2000SPE-176	13.4319	4.79566	0.281492	2.21995e-05	0.00077447	0.281464	-45.7125	0.785032	-3.40485	1918.1
MCAFEE-97SF1-GG2000SPE-166	6.6815	5.5513	0.281445	2.02406e-05	0.000398225	0.28143	-47.395	0.71576	-4.52507	1921.71
MCAFEE-97SF1-GG2000SPE-187	8.04165	5.45639	0.281353	1.85842e-05	0.00047271	0.281335	-50.6494	0.657185	-7.70738	1929.75
MCAFEE-97SF1-GG2000SPE-20	7.98417	4.53121	0.281419	2.40975e-05	0.000459284	0.281402	-48.3226	0.852148	-5.28351	1932.8
MCAFEE-97SF1-GG2000SPE-172	3.9189	4.92015	0.281463	1.92844e-05	0.000234161	0.281455	-46.7362	0.681947	-3.34307	1935.12
MCAFEE-97SF1-GG2000SPE-169	6.44632	4.88874	0.281483	2.19363e-05	0.000424253	0.281467	-46.0576	0.775723	-2.82787	1938.72
MCAFEE-97SF1-GG2000SPE-17	8.98159	5.10432	0.281481	2.55868e-05	0.000540108	0.28146	-46.1192	0.904814	-0.0634064	2069.57
MCAFEE-97SF1-GG2000SPE-159	7.33249	5.81389	0.281462	1.5942e-05	0.000477486	0.281443	-46.7855	0.563751	-0.437803	2078.65
MCAFEE-97SF1-GG2000SPE-157	10.0767	5.09809	0.281479	1.77018e-05	0.000654055	0.281453	-46.1849	0.625979	0.187751	2090.55
MCAFEE-97SF1-GG2000SPE-144	18.4028	6.07547	0.281458	1.69729e-05	0.00110695	0.281414	-46.9086	0.600206	-1.16109	2091.39
MCAFEE-97SF1-GG2000SPE-161	13.6278	5.12762	0.281399	1.9426e-05	0.000831298	0.281365	-49.0269	0.686953	-2.82306	2094.77
MCAFEE-97SF1-GG2000SPE-109	7.58685	4.63611	0.28089	1.81019e-05	0.000460169	0.280866	-67.0247	0.64013	-7.28927	2664.81
MCAFEE-97SF1-GG2000SPE-189	7.11837	4.50027	0.281061	1.87571e-05	0.000470272	0.281036	-60.9815	0.663299	-0.561075	2693.62
MCAFEE-97SF1-GG2000SPE-5	5.39036	4.84709	0.280917	2.84152e-05	0.000345972	0.280899	-66.0583	1.00483	-5.36936	2696.71
Sample: lower Vinini Formation. Location: Petes Summit, Toquima Range; 0518089 4337111 (NAD 83 UTM 11T)
Low-Vinini-97SF12-GG2000SPE-21	15.1492	3.04858	0.28237	3.13636e-05	0.000924459	0.282362	-14.6589	1.1091	-4.34465	476.2
Low-Vinini-97SF12-GG2000SPE-19	19.8321	3.07205	0.282504	2.68875e-05	0.00116313	0.282493	-9.95291	0.950809	0.438855	483.04
Low-Vinini-97SF12-GG2000SPE-165	47.5884	3.66064	0.282535	3.01027e-05	0.00277508	0.28251	-8.84548	1.06451	1.08378	485.63
Low-Vinini-97SF12-GG2000SPE-22	11.9398	5.6053	0.282469	2.14034e-05	0.000660103	0.282463	-11.1617	0.756878	-0.381901	493.42
Low-Vinini-97SF12-GG2000SPE-20	12.6834	5.25375	0.282504	1.68323e-05	0.000704451	0.282497	-9.95143	0.595234	0.832763	494.22
Low-Vinini-97SF12-GG2000SPE-176	22.4918	4.29072	0.282514	1.9676e-05	0.00126926	0.282502	-9.57509	0.695794	1.03776	494.85
Low-Vinini-97SF12-GG2000SPE-190	17.6586	4.35144	0.282508	1.8933e-05	0.000997463	0.282499	-9.79401	0.669521	0.916166	495.23
Low-Vinini-97SF12-GG2000SPE-10	19.2424	5.79846	0.2818	1.55824e-05	0.00113979	0.281789	-34.8347	0.551034	-24.188	495.74
Low-Vinini-97SF12-GG2000SPE-35	28.9294	6.1126	0.281903	2.23414e-05	0.00177939	0.281886	-31.2052	0.790048	-20.7313	497.33
Low-Vinini-97SF12-GG2000SPE-35	29.9109	4.82098	0.282567	2.40997e-05	0.00162702	0.282552	-7.69978	0.852228	2.85049	497.33
Low-Vinini-97SF12-GG2000SPE-45	25.5032	5.30289	0.282253	1.74114e-05	0.00133443	0.282225	-18.8161	0.61571	5.23834	1116.85
Low-Vinini-97SF12-GG2000SPE-2	36.2578	4.57236	0.282133	2.25302e-05	0.00215995	0.282074	-23.0737	0.796725	6.85638	1421.81
Low-Vinini-97SF12-GG2000SPE-101	18.2776	4.45183	0.282014	2.04489e-05	0.00104689	0.281985	-27.2692	0.723126	3.96529	1433.35
Low-Vinini-97SF12-GG2000SPE-121	13.9616	4.8463	0.281986	1.83868e-05	0.000821252	0.281963	-28.2712	0.650205	3.18766	1433.82
Low-Vinini-97SF12-GG2000SPE-27	8.78884	4.74089	0.282086	2.15154e-05	0.000530766	0.282072	-24.7097	0.760839	7.07609	1435.41
Low-Vinini-97SF12-GG2000SPE-87	14.9875	4.81132	0.281975	2.08121e-05	0.000851894	0.281952	-28.6506	0.735969	3.01464	1444.46
Low-Vinini-97SF12-GG2000SPE-28	16.0882	5.54035	0.281936	1.57508e-05	0.000975653	0.281905	-30.0123	0.55699	7.07551	1693.56
Low-Vinini-97SF12-GG2000SPE-172	25.6136	4.31407	0.281939	2.59641e-05	0.001533	0.28189	-29.9005	0.918156	6.55761	1693.81
Low-Vinini-97SF12-GG2000SPE-41	12.7916	5.31872	0.281905	1.61772e-05	0.000827393	0.281878	-31.1214	0.572068	6.45267	1707.89
Low-Vinini-97SF12-GG2000SPE-43	19.6333	5.94358	0.281827	1.80321e-05	0.00114294	0.28179	-33.8649	0.637663	3.45096	1713.08
Low-Vinini-97SF12-GG2000SPE-23	24.3133	5.47851	0.281764	2.20223e-05	0.00138954	0.281719	-36.1037	0.778765	0.983168	1715.99
Low-Vinini-97SF12-GG2000SPE-8	12.0796	4.58442	0.281844	1.94223e-05	0.000709525	0.28182	-33.2911	0.686822	4.62525	1717.44
Low-Vinini-97SF12-GG2000SPE-194	16.8304	6.47271	0.281822	1.87989e-05	0.0010017	0.281789	-34.0449	0.664778	3.68697	1724.45
Low-Vinini-97SF12-GG2000SPE-3	4.86158	4.53701	0.28187	1.9994e-05	0.000318847	0.281859	-32.3623	0.70704	6.35579	1732.63
Low-Vinini-97SF12-GG2000SPE-9	11.4519	4.96227	0.281915	1.96436e-05	0.000671783	0.281893	-30.7768	0.694646	7.5421	1732.92
Low-Vinini-97SF12-GG2000SPE-164	13.3318	4.02025	0.282002	1.99813e-05	0.000843148	0.281975	-27.6781	0.706589	10.5271	1736.22
Low-Vinini-97SF12-GG2000SPE-37	27.2661	4.84269	0.282009	2.32905e-05	0.00161588	0.281955	-27.4483	0.823611	10.0208	1743.83
Low-Vinini-97SF12-GG2000SPE-26	6.53356	5.34953	0.281938	2.08764e-05	0.000390731	0.281925	-29.9577	0.738243	8.95354	1744.39
Low-Vinini-97SF12-GG2000SPE-174	10.6819	4.895	0.281843	1.78247e-05	0.000672738	0.28182	-33.328	0.630328	5.76861	1767.88
Low-Vinini-97SF12-GG2000SPE-39	15.9391	5.56895	0.281733	1.64526e-05	0.00092323	0.281702	-37.1925	0.581804	1.73459	1774.33
Low-Vinini-97SF12-GG2000SPE-14	4.46296	5.56183	0.281841	1.87673e-05	0.000265226	0.281832	-33.3797	0.663658	6.55073	1783.13
Low-Vinini-97SF12-GG2000SPE-49	14.3147	5.40589	0.281675	1.89203e-05	0.000851579	0.281646	-39.2431	0.669069	0.00384129	1785.13
Low-Vinini-97SF12-GG2000SPE-200	11.2697	5.34249	0.281202	2.0316e-05	0.000669414	0.28117	-55.9835	0.718427	-0.60645	2488.52
Sample: upper Vinini Formation. Location: Petes Summit, Toquima Range; 0518089 4337111 (NAD 83 UTM 11T)
upper VININI-97SF-11-GG2000SPE-138	11.3838	5.52397	0.281589	2.16353e-05	0.000655555	0.281566	-42.3042	0.765079	-2.6947	1791.29
upper VININI-97SF-11-GG2000SPE-192	7.31652	4.15585	0.281493	2.43115e-05	0.000444876	0.281478	-45.6737	0.859716	-5.41342	1809.34
upper VININI-97SF-11-GG2000SPE-25	6.36284	5.29954	0.281319	2.35445e-05	0.000392211	0.281306	-51.8344	0.832595	-11.4383	1813.6
upper VININI-97SF-11-GG2000SPE-187	10.8116	5.8257	0.2815	2.11372e-05	0.000684064	0.281476	-45.4433	0.747465	-5.16725	1822.93
upper VININI-97SF-11-GG2000SPE-27	9.69947	4.6066	0.281388	2.38726e-05	0.000576794	0.281368	-49.4043	0.844196	-8.89262	1828.24
upper VININI-97SF-11-GG2000SPE-17	6.32159	5.98629	0.281504	2.04953e-05	0.000381438	0.281491	-45.3034	0.724767	-4.52974	1828.42
upper VININI-97SF-11-GG2000SPE-4	11.527	4.45557	0.281568	2.08547e-05	0.000675977	0.281544	-43.0431	0.737476	-2.56615	1830.95
upper VININI-97SF-11-GG2000SPE-180	13.8968	4.14051	0.281649	2.58404e-05	0.00089704	0.281618	-40.178	0.913783	0.0991173	1833.68
upper VININI-97SF-11-GG2000SPE-182	11.8674	5.29432	0.281476	2.55043e-05	0.000686367	0.281452	-46.2935	0.901896	-5.77676	1833.88
upper VININI-97SF-11-GG2000SPE-1	13.1515	4.36054	0.28157	2.20746e-05	0.00076983	0.281544	-42.9528	0.780613	-2.50827	1834.64
upper VININI-97SF-11-GG2000SPE-19	10.6182	4.21302	0.281416	2.01986e-05	0.000649051	0.281393	-48.4221	0.714272	-7.81271	1836.33
upper VININI-97SF-11-GG2000SPE-145	7.63532	5.94198	0.281465	1.92388e-05	0.000458688	0.281449	-46.6771	0.680335	-5.68313	1842.56
upper VININI-97SF-11-GG2000SPE-139	13.7984	4.44999	0.281767	2.5651e-05	0.000915514	0.281735	-35.9926	0.907083	4.49732	1843.41
upper VININI-97SF-11-GG2000SPE-165	11.1988	4.59051	0.281518	2.77097e-05	0.000666388	0.281495	-44.8	0.979885	-4.01469	1844.4
upper VININI-97SF-11-GG2000SPE-169	10.93	3.94117	0.281472	2.18875e-05	0.000668157	0.281449	-46.4218	0.773998	-5.63258	1844.97
upper VININI-97SF-11-GG2000SPE-159	15.2358	4.4036	0.28151	2.53845e-05	0.000895314	0.281479	-45.0813	0.89766	-4.53956	1846.29
upper VININI-97SF-11-GG2000SPE-6	8.68206	4.95285	0.281424	2.14277e-05	0.000533749	0.281405	-48.1416	0.757737	-7.07875	1849.98
upper VININI-97SF-11-GG2000SPE-15	10.8751	4.33471	0.281576	1.88778e-05	0.000667295	0.281553	-42.7386	0.667567	-1.73881	1853.56
upper VININI-97SF-11-GG2000SPE-198	15.403	3.21889	0.281794	2.9237e-05	0.000941438	0.281761	-35.035	1.0339	5.68259	1854.82
upper VININI-97SF-11-GG2000SPE-8	4.25166	5.58166	0.281494	2.01569e-05	0.000272745	0.281485	-45.6453	0.7128	-3.93529	1863.58
upper VININI-97SF-11-GG2000SPE-9	13.0044	5.2406	0.281844	1.87196e-05	0.000808174	0.281815	-33.2765	0.661974	8.00137	1871.96
upper VININI-97SF-11-GG2000SPE-5	7.52896	4.30127	0.281495	2.59861e-05	0.000435108	0.281479	-45.6345	0.918934	-3.50988	1890.76
upper VININI-97SF-11-GG2000SPE-150	8.67683	5.19554	0.281498	2.01753e-05	0.00054098	0.281478	-45.5163	0.71345	-3.44085	1894.52
upper VININI-97SF-11-GG2000SPE-149	11.7242	4.45081	0.281463	2.32665e-05	0.000703058	0.281438	-46.7326	0.822762	-4.82945	1896.3
upper VININI-97SF-11-GG2000SPE-133	6.51044	5.04331	0.281477	1.77177e-05	0.000395368	0.281463	-46.2452	0.626544	-3.72793	1905.87
upper VININI-97SF-11-GG2000SPE-2	8.21297	5.01769	0.281514	2.40047e-05	0.000485544	0.281496	-44.9552	0.848866	-2.49034	1908.42
upper VININI-97SF-11-GG2000SPE-199	7.7558	4.52808	0.281562	2.52571e-05	0.000490847	0.281544	-43.234	0.893154	-0.361189	1926.32
upper VININI-97SF-11-GG2000SPE-197	8.56452	4.85134	0.281352	2.34173e-05	0.000496416	0.281334	-50.6635	0.828095	-7.759	1929.46
upper VININI-97SF-11-GG2000SPE-11	5.54589	5.21541	0.281162	2.51741e-05	0.000341458	0.28115	-57.3768	0.890221	-14.1223	1937.24
upper VININI-97SF-11-GG2000SPE-7	8.98917	5.30306	0.281354	2.18465e-05	0.000519016	0.281335	-50.6125	0.772549	-7.55656	1937.41
upper VININI-97SF-11-GG2000SPE-160	6.03758	5.46709	0.281464	1.39792e-05	0.000374542	0.28145	-46.7032	0.494339	-2.60406	1974.05
upper VININI-97SF-11-GG2000SPE-12	10.2165	4.82866	0.281496	1.82469e-05	0.000645382	0.281471	-45.5675	0.645257	0.436953	2073.68
upper VININI-97SF-11-GG2000SPE-179	7.77835	5.08891	0.281399	2.27759e-05	0.000460826	0.281381	-49.0069	0.805413	-2.69546	2076.5
upper VININI-97SF-11-GG2000SPE-178	32.5751	5.08985	0.281508	2.65903e-05	0.00190988	0.281432	-45.1583	0.9403	-0.659243	2085.86
upper VININI-97SF-11-GG2000SPE-189	9.32876	5.11277	0.281441	2.00016e-05	0.000577643	0.281418	-47.5305	0.707306	-1.16188	2085.91
upper VININI-97SF-11-GG2000SPE-23	11.15	5.21164	0.28141	1.87649e-05	0.000669568	0.281384	-48.6177	0.663576	-2.3113	2089.11
upper VININI-97SF-11-GG2000SPE-135	12.0765	4.77825	0.281414	2.26873e-05	0.000742662	0.281384	-48.4791	0.80228	-2.01765	2100.48
upper VININI-97SF-11-GG2000SPE-125	8.86843	4.14346	0.281371	2.18751e-05	0.000548126	0.281347	-50.0068	0.77356	1.67847	2317.29
upper VININI-97SF-11-GG2000SPE-200	1.74367	4.66419	0.281044	2.33428e-05	0.000107494	0.281039	-61.5616	0.825463	-0.876249	2676.64
upper VININI-97SF-11-GG2000SPE-194	9.49482	3.88414	0.280969	2.48662e-05	0.000571056	0.280939	-64.2258	0.879331	-3.55311	2713.44
upper VININI-97SF-11-GG2000SPE-22	14.386	4.271	0.281085	2.26536e-05	0.000806504	0.281043	-60.1338	0.801088	0.129158	2713.45
Sample: Elder Sandstone. Location: Elder Creek, Shoshone Range; 0516196 4460270 (NAD 83 UTM 11T)
Elder-SS-GG2000SPE-59	12.9705	3.74696	0.28172	2.23801e-05	0.000744825	0.281695	-37.6445	0.791417	2.58677	1822.83
Elder-SS-GG2000SPE-43	10.0887	4.44651	0.28156	2.0437e-05	0.000598384	0.281539	-43.3221	0.722704	-2.91168	1823.83
Elder-SS-GG2000SPE-47	12.1876	4.22053	0.281403	2.26544e-05	0.000670906	0.28138	-48.8706	0.801119	-8.51946	1826.17
Elder-SS-GG2000SPE-52	15.5907	4.03377	0.281483	1.96387e-05	0.000874848	0.281453	-46.0377	0.694473	-5.80261	1831.67
Elder-SS-GG2000SPE-42	10.5354	4.41088	0.281431	1.99891e-05	0.000627261	0.281409	-47.8893	0.706865	-7.28645	1834.75
Elder-SS-GG2000SPE-36	10.8295	5.9311	0.28146	1.85595e-05	0.000690521	0.281436	-46.8698	0.656312	-6.33735	1834.91
Elder-SS-GG2000SPE-49	8.52702	5.18732	0.281431	1.81239e-05	0.000489265	0.281414	-47.8841	0.640906	-7.09314	1835.51
Elder-SS-GG2000SPE-64	12.8195	4.67634	0.281571	2.18598e-05	0.000749291	0.281545	-42.9137	0.77302	-2.42037	1835.67
Elder-SS-GG2000SPE-28	17.1164	5.86237	0.281385	2.2082e-05	0.000964052	0.281352	-49.4905	0.780878	-9.08221	1844.98
Elder-SS-GG2000SPE-33	13.0035	4.02302	0.281749	2.3617e-05	0.000772059	0.281722	-36.6291	0.835158	4.09445	1845.98
Elder-SS-GG2000SPE-72	8.51977	4.78998	0.281562	1.63255e-05	0.000497619	0.281544	-43.2654	0.577312	-2.22691	1846.02
Elder-SS-GG2000SPE-16	7.38405	4.45714	0.281331	2.73822e-05	0.000497342	0.281314	-51.4071	0.968303	-10.3874	1846.68
Elder-SS-GG2000SPE-101	12.0294	4.17081	0.281568	2.03949e-05	0.000690909	0.281544	-43.0235	0.721216	-2.20961	1846.69
Elder-SS-GG2000SPE-102	17.8363	3.00952	0.281592	3.77604e-05	0.00115556	0.281551	-42.1879	1.3353	-1.93303	1847.42
Elder-SS-GG2000SPE-30	37.7628	3.89638	0.281899	3.51189e-05	0.00202315	0.281828	-31.3297	1.24189	7.91434	1848.57
Elder-SS-GG2000SPE-18	18.6297	4.18474	0.281581	2.45646e-05	0.00104872	0.281544	-42.5859	0.868666	-2.16567	1848.94
Elder-SS-GG2000SPE-13	13.5156	4.72211	0.281545	1.95653e-05	0.000771525	0.281517	-43.8648	0.69188	-3.07263	1850.34
Elder-SS-GG2000SPE-17	52.7069	4.69293	0.281635	3.62026e-05	0.00269574	0.28154	-40.6827	1.28022	-2.22171	1853.04
Elder-SS-GG2000SPE-21	9.14244	3.15553	0.28159	2.45041e-05	0.000525869	0.281571	-42.2589	0.866529	-0.930263	1860.17
Elder-SS-GG2000SPE-12	12.1443	4.25281	0.281539	2.21736e-05	0.000760829	0.281512	-44.0772	0.784116	-2.81713	1870.55
Elder-SS-GG2000SPE-141	49.1583	3.81749	0.281879	3.07855e-05	0.00311344	0.281767	-32.0457	1.08865	6.59758	1884.94
Elder-SS-GG2000SPE-148	10.8134	4.01143	0.281435	2.67981e-05	0.000591926	0.281414	-47.7363	0.947651	-5.70296	1895.96
Elder-SS-GG2000SPE-148	15.8916	3.74068	0.281566	2.54118e-05	0.000990371	0.28153	-43.1059	0.898627	-1.56251	1895.96
Elder-SS-GG2000SPE-41	7.19404	4.86734	0.281383	1.70701e-05	0.000393271	0.281368	-49.5948	0.603641	-6.9153	1913.5
Elder-SS-GG2000SPE-92	10.3455	4.51689	0.281417	1.7355e-05	0.000547176	0.281398	-48.3589	0.613718	-5.78568	1917.34
Elder-SS-GG2000SPE-66	11.406	5.54214	0.281432	1.95916e-05	0.000691032	0.281404	-47.8591	0.69281	-2.03886	2068.86
Elder-SS-GG2000SPE-57	10.6664	4.57804	0.281486	2.05275e-05	0.00062207	0.281461	-45.9431	0.725905	0.194593	2078.18
Elder-SS-GG2000SPE-37	8.37792	5.13463	0.28149	1.91686e-05	0.000535402	0.281469	-45.7986	0.67785	0.588782	2083.76
Elder-SS-GG2000SPE-11	7.65019	5.4432	0.281463	2.13003e-05	0.000510571	0.281443	-46.7412	0.753232	-0.317057	2084.03
Elder-SS-GG2000SPE-27	14.8777	5.37583	0.281488	2.00557e-05	0.000832107	0.281455	-45.8638	0.709221	0.202545	2088.07
Elder-SS-GG2000SPE-31	6.19897	5.25366	0.281858	2.15931e-05	0.000355153	0.281841	-32.7685	0.763588	26.0023	2606.16
Elder-SS-GG2000SPE-62	7.13081	4.26841	0.281216	1.74805e-05	0.000421851	0.281195	-55.4735	0.618156	3.37589	2620.51
Elder-SS-GG2000SPE-95	12.4514	4.91628	0.280973	2.09415e-05	0.000664743	0.280938	-64.0792	0.740544	-3.50137	2716.81
Sample: Slaven Chert. Location: Slaven Canyon, Shoshone Range; 0519428 4479302 (NAD 83 UTM 11T)
Slaven-RMA-GG2000SPE-172	44.8323	4.34118	0.28183	2.67196e-05	0.0025938	0.281742	-33.7754	0.944872	3.42187	1786.29
Slaven-RMA-GG2000SPE-129	12.0377	4.89078	0.281468	2.88485e-05	0.000687295	0.281444	-46.5649	1.02016	-6.2479	1825.13
Slaven-RMA-GG2000SPE-168	6.66585	5.02162	0.281442	2.14221e-05	0.000401464	0.281428	-47.4892	0.757539	-6.82354	1825.16
Slaven-RMA-GG2000SPE-15	14.8571	4.18357	0.28167	2.23114e-05	0.000788192	0.281643	-39.4132	0.78899	0.819317	1825.58
Slaven-RMA-GG2000SPE-100	5.47182	3.87286	0.281603	2.94274e-05	0.000346915	0.281591	-41.803	1.04063	-1.02607	1826.06
Slaven-RMA-GG2000SPE-167	8.9829	3.98144	0.281637	2.31908e-05	0.000546194	0.281618	-40.6006	0.820087	0.00843893	1829.26
Slaven-RMA-GG2000SPE-78	10.3513	4.85466	0.28164	2.46161e-05	0.00064582	0.281618	-40.4916	0.870489	0.0179823	1830.28
Slaven-RMA-GG2000SPE-180	7.54996	5.18129	0.281444	1.61721e-05	0.000453019	0.281428	-47.4374	0.571888	-6.68766	1831.64
Slaven-RMA-GG2000SPE-152	9.22927	5.43209	0.281491	2.56118e-05	0.000550608	0.281472	-45.7458	0.905698	-5.10693	1831.76
Slaven-RMA-GG2000SPE-142	11.193	5.63379	0.281458	2.69429e-05	0.000654663	0.281435	-46.9413	0.952771	-6.42774	1832.12
Slaven-RMA-GG2000SPE-186	10.1979	4.84927	0.281743	2.77177e-05	0.000578258	0.281723	-36.8416	0.980168	3.81463	1832.4
Slaven-RMA-GG2000SPE-197	15.9282	5.27583	0.281339	3.10856e-05	0.00089111	0.281308	-51.1481	1.09927	-10.8155	1837.86
Slaven-RMA-GG2000SPE-126	7.8653	4.58663	0.281476	2.5882e-05	0.00047997	0.281459	-46.2821	0.915255	-5.24569	1845.52
Slaven-RMA-GG2000SPE-53	8.13952	5.31972	0.281454	2.6642e-05	0.000487728	0.281437	-47.0653	0.942129	-6.04137	1845.54
Slaven-RMA-GG2000SPE-108	11.7476	5.33078	0.281385	2.2257e-05	0.000683624	0.281361	-49.5209	0.787065	-8.74658	1845.74
Slaven-RMA-GG2000SPE-140	7.59013	4.96623	0.281458	2.03746e-05	0.000458819	0.281442	-46.9318	0.720497	-5.85539	1846.24
Slaven-RMA-GG2000SPE-13	9.23424	4.38684	0.281474	2.2918e-05	0.000558749	0.281454	-46.3763	0.810441	-5.41362	1846.61
Slaven-RMA-GG2000SPE-7	14.4573	4.53064	0.281591	2.62562e-05	0.000862782	0.281561	-42.2205	0.928487	-1.6185	1846.64
Slaven-RMA-GG2000SPE-1	8.00207	4.68716	0.28153	3.62118e-05	0.000478285	0.281514	-44.3656	1.28054	-3.27107	1847.63
Slaven-RMA-GG2000SPE-20	9.42503	4.64948	0.281455	2.72148e-05	0.000543061	0.281436	-47.034	0.962386	-6.00554	1848.77
Slaven-RMA-GG2000SPE-67	10.0744	4.58861	0.281498	2.54247e-05	0.00061208	0.281477	-45.4942	0.899082	-4.52955	1849.47
Slaven-RMA-GG2000SPE-137	4.90403	5.10322	0.28187	1.67048e-05	0.000295771	0.281859	-32.3699	0.590723	9.09978	1851.89
Slaven-RMA-GG2000SPE-5	16.9767	5.06293	0.281519	2.5051e-05	0.00101768	0.281483	-44.7617	0.885867	-4.23386	1852.43
Slaven-RMA-GG2000SPE-170	8.60836	4.71389	0.281522	1.66651e-05	0.000538066	0.281503	-44.6504	0.58932	-3.07148	1872.32
Slaven-RMA-GG2000SPE-86	13.2853	4.33286	0.281479	2.42469e-05	0.000803819	0.28145	-46.1813	0.857432	-4.90407	1874.12
Slaven-RMA-GG2000SPE-117	7.54432	6.84435	0.281536	2.28051e-05	0.000473516	0.281519	-44.1508	0.806448	-1.56246	1913.01
Slaven-RMA-GG2000SPE-109	4.58826	4.2516	0.281358	3.45207e-05	0.000278261	0.281347	-50.4775	1.22074	-7.38695	1925.14
Slaven-RMA-GG2000SPE-156	6.77329	4.51387	0.281482	2.42608e-05	0.000418704	0.281467	-46.0683	0.857924	-3.09194	1927.29
Slaven-RMA-GG2000SPE-18	7.74922	4.75113	0.281656	2.41975e-05	0.000465371	0.281639	-39.9396	0.855687	3.04201	1929.01
Slaven-RMA-GG2000SPE-107	13.1108	5.27339	0.281504	3.89525e-05	0.000767678	0.281474	-45.3035	1.37746	0.361788	2066.22
Slaven-RMA-GG2000SPE-39	13.7813	5.65927	0.281482	2.11157e-05	0.000825206	0.281449	-46.0831	0.746706	-0.411481	2070.22
Slaven-RMA-GG2000SPE-35	11.2127	4.4082	0.281547	2.6722e-05	0.000864521	0.281513	-43.7805	0.944957	2.19386	2085.59
Slaven-RMA-GG2000SPE-175	18.1836	5.11551	0.281436	1.71478e-05	0.00103651	0.281395	-47.7027	0.606391	-1.80694	2093.72
Slaven-RMA-GG2000SPE-90	11.4777	5.36833	0.281257	2.09832e-05	0.000679673	0.281224	-54.0289	0.742021	3.24266	2571.44
Slaven-RMA-GG2000SPE-153	11.2453	5.55024	0.281245	2.84691e-05	0.000644433	0.281213	-54.454	1.00674	2.88978	2572.01
Slaven-RMA-GG2000SPE-48	15.1063	5.07367	0.280907	3.28636e-05	0.000865665	0.280863	-66.4096	1.16214	-7.28353	2670.19
Slaven-RMA-GG2000SPE-82	8.2684	4.19593	0.28128	3.29362e-05	0.000554222	0.281251	-53.2234	1.16471	6.92308	2686.36
Slaven-RMA-GG2000SPE-148	22.9405	4.19629	0.281257	2.87979e-05	0.00134918	0.281187	-54.0429	1.01837	4.78174	2692.48
Notes for tables:
1. Data reduction methodology is from Woodhead et al. (2004)
2. Analytical methods described in detail by Gehrels and Pecha (2014)
3. (176Yb + 176Lu) / 176Hf (%) expresses the proportion of 176 due to 176Yb + 176Lu versus the proportion due to 176Hf, in %.
4. Volts Hf is the sum of voltages of all Hf isotopes.
5. 176Hf/177Hf is the measured 176Hf/177Hf, corrected for fractionation and interfences. Shown with uncertainty expressed at 1-sigma.
6. 176Lu/177Hf is the intensity of 176Lu, calculated from the measured instensity of 175Lu and 176Lu/175Lu=0.02653 (from Patchett, 1983), compared to the
measured intensity of 177Hf. Fractionation of Lu isotopes is assumed to be the same as fractionation of Yb isotopes.
7. 176Hf/177Hf (T) is the 176Hf/177Hf corrected to the time of crystallization using a decay constant of 1.867e-11 (from Scherer et al., 2001 and
Soderland et al., 2004)
8. E-Hf (0) is the present-day epsilon Hf value using 176Hf/177Hf=0.282785 and 176Lu/177Hf=0.0336 (from Bouvier et al., 2008). The uncertainty is expressed
at 1-sigma.
9. E-Hf (T) is the epsilon Hf value at the time of crystallization. The uncertainty is expressed at 1-sigma.
10. U-Pb ages are based on 206/238 for ages younger than ~1.0 Ga, and on 206/207 for ages older than ~1.0 Ga. This age cutoff may be slightly different for
each sample.
11. Isotope ratios as follows:
180/177	1.88666	Patchett (1983)
179/177	0.7325	Patchett & Tatsumoto (1980)
178/177	1.46718	Patchett (1983)
176/177	0.28216	Patchett (1983)
174/177	0.00871	Patchett (1983)
176/175	0.02653	Patchett (1983)
176/171	0.901691	Vervoort et al. (2004)
173/171	1.13236	Vervoort et al. (2004)
172/171	1.53174	Vervoort et al. (2004)
Notes for plots:
1. DM array is from Vervoort and Blichert-Toft (1999), using 176Hf/177Hf=0.283225 and 176Lu/177Hf=0.0383
2. CHUR is from Bouvier et al. (2008), using 176Hf/177Hf=0.282785 and 176Lu/177Hf=0.0336.
3. Hf isotope evolution lines assume an average value of 176Lu/177Hf=0.0115 and a range of 176Lu/177Hf=0.0036 to 176Lu/177Hf=0.0193.
Values are from the average and 2-sigma range of values reported by Vervoort and Patchett (1996) and Vervoort et al. (1999).
4. Uncertainties shown at 2-sigma.
5. Uncertainty for EpsilonT is nearly identical for Espsilon 0 because of the very long half-life.
References:
Bouvier, A., Vervoort, J., and Patchett, J., 2008, The Lu-Hf and Sm-Nd isotopic composiiton of CHUR: Consraints from unequilibrated chondrites and implications
for the bulk composition of terrestrial planets: Earth and Planetary Science Letters: v. 273, p. 48-57.
Gehrels, G. and Pecha, M., 2014, Detrital zircon U-Pb geochronology and Hf isotope geochemistry of Paleozoic and Triassic passive margin strata of western
North America: Geosphere, v. 10 (1), p. 49-65.
Patchett, P.J., and Tatsumoto, M., 1980, A routine high-precision method for Lu-Hf isotope geochemistry and chronology: Contributions to Mineralogy and
Petrology, v. 75, 263-267.
Patchett, P.J., 1983, Importance of the Lu-Hf isotopic system in studies of planetary chronology and chemical evolution: Geochimica et Cosmochimica Acta, x
North America: Geosphere, v. 10 (1), p. 49-65.
Scherer, E., Munker, C., and Mezger, K., 2001, Calibrating the Lu-Hf clock: Science, v. 293, p. 683–686,
Söderlund, U., Patchett, P.J., Vervoort, J.D. and Isachsen, C.E., 2004, The 176Lu decay constant determined by Lu-Hf and U-Pb isotope systematics of
Precambrian mafic intrusions: Earth and Planetary Science Letters, v. 219, p. 311-324.
Vervoort, J.D., and Patchett, P.J., 1996, Behavior of hafnium and neodymium isotopes in the crust: constraints from Precambrian crustally derived granites:
Geochimica et Cosmochimica Acta, v. 60, p. 3717-3723.
Vervoort, J. D., and Blichert-Toft, J., 1999, Evolution of the depleted mantle: Hf isotope evidence from juvenile rocks through time: Geochimica et Cosmochimica
Acta, v. 63, p. 533–556.
Vervoort, J.D., Patchett, P.J., Blichert-Toft, J., and Albarede, F., 1999, Relationships between Lu-Hf and Sm-Nd isotopic systems in the global sedimentary
system: Earth and Planetary Science Letters, v. 168, p. 79-99.
Vervoort, J.D., Patchett, P.J., Soderlund, U., and Baker, M., 2004, Isotopic composition of Yb and the determination of Lu concentrations and Lu/Hf ratios by
isotope dilution using MC-ICPMS: Geochemistry Geophysics Geosystems, v. 5, Q11002.
Woodhead, J.D., and Hergt, J.M., 2004, A preliminary appraisal of seven natural zircon reference materials for in situ Hf isotope determination: Geostandards and
Geoanalytical Research, v. 29 (2), p. 183-195.
Woodhead, J., Hergt, J., Shelley, M., Eggins, S., and Kemp, R., 2004, Zircon Hf-isotope analysis with an excimer laser, depth profiling, ablation of complex
geometries, and concomitant age estimation: Chemical Geology, v. 209, p. 121-135.
